# Supplementary material
Source: publisher site journal article supplement (http://www.kjim.org/upload/media/kjim-2019-339-suppl.pdf)
Supplement: Supplementary file 1 [file kjim-2019-339-suppl.pdf]

**Supplementary Table 1. Correlation among T cell responses to BKV-specific antigens and peak level of BKV viral loads (n = 40)**

| Spearman's correlation        | T cell response measured using ELISPOT |         |        |        |       |
|-------------------------------|----------------------------------------|---------|--------|--------|-------|
|                               | Large T                                | Small t | VP1    | VP2    | VP3   |
| Peak plasma BKV-DNA PCR (log) |                                        |         |        |        |       |
| Rho                           | -0.228                                 | -0.070  | -0.180 | -0.168 | 0.003 |
| p value                       | 0.156                                  | 0.672   | 0.308  | 0.308  | 0.985 |

BKV, BK virus; ELISPOT, enzyme-linked immunospot; PCR, polymerase chain reaction.
